# Supplementary material for: Transformation of homobimetallic MOFs into nickel–cobalt phosphide/nitrogen-doped carbon polyhedral nanocages for efficient oxygen evolution electrocatalysis
Source: Royal Society of Chemistry journal article supplement (doi:10.1039/c7ta06272a), 2017-01-01
Supplement: c7ta06272a1.pdf [file c7ta06272a1.pdf]

## Supporting information

### **Transformation of homobimetallic MOFs to nickel-cobalt phosphide/nitrogen-doped carbon polyhedral nanocages for efficient oxygen evolution electrocatalysts**

Xueping Zhang,<sup>a,b</sup> Liang Huang,<sup>a,c</sup> Qingqing Wang<sup>a</sup> and Shaojun Dong<sup>\*,a,b</sup>

<sup>a</sup>State Key Laboratory of Electroanalytical Chemistry, Changchun Institute of Applied Chemistry,  
Chinese Academy of Sciences, Changchun 130022, P. R. China

<sup>b</sup>University of Chinese Academy of Sciences, Beijing 100049, P. R. China

<sup>c</sup>University of Science and Technology of China, Hefei, Anhui 230026, P. R. China

\*E-mail: dongsj@ciac.ac.cn

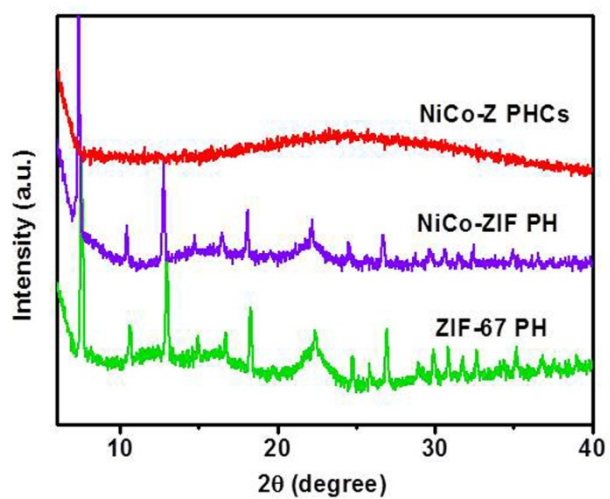

**Fig. S1** XRD patterns of NiCo-Z PHCs, NiCo-ZIF PH, and ZIF-67 PH.

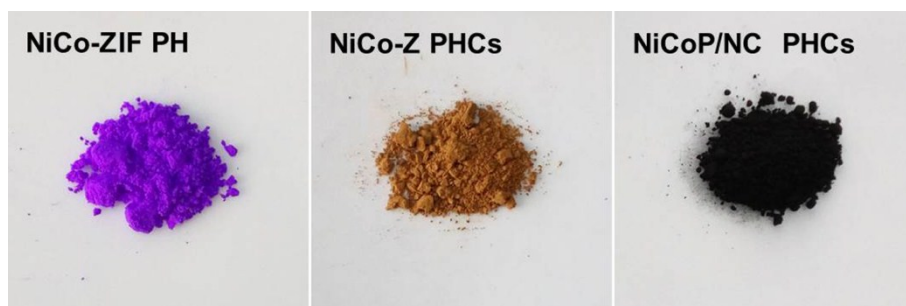

**Fig. S2** The picture of solid samples of NiCo-ZIF PH, NiCo-Z PHCs, and NiCoP/NC PHCs.

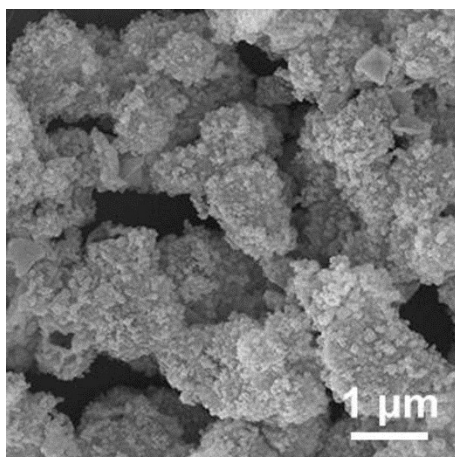

**Fig. S3** SEM image of the scale-up synthesis of NiCo-Z PHCs by using 200 mg of NiCo-ZIF PH and 100 mL of methanol solution containing 500 mg of tannic acid.

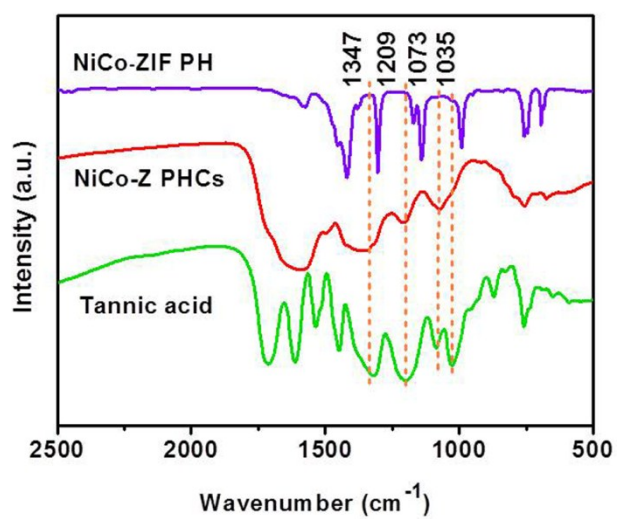

**Fig. S4** FT-IR spectra of NiCo-ZIF PH, NiCo-Z PHCs, and tannic acid.

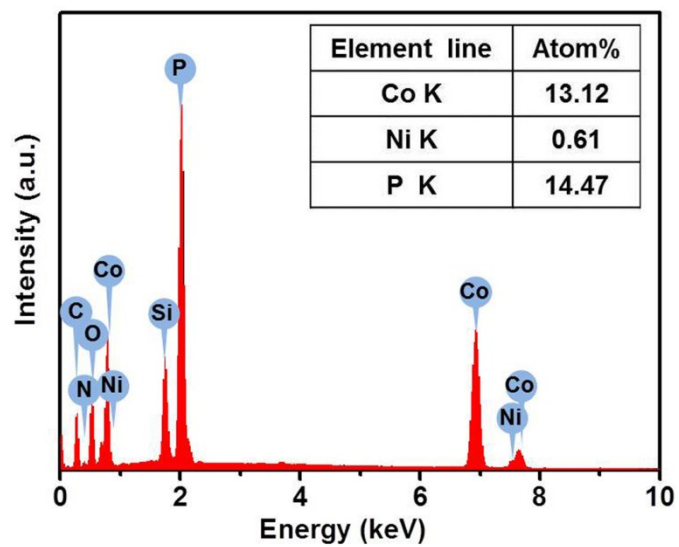

**Fig. S5** EDX spectrum of NiCoP/NC PHCs.

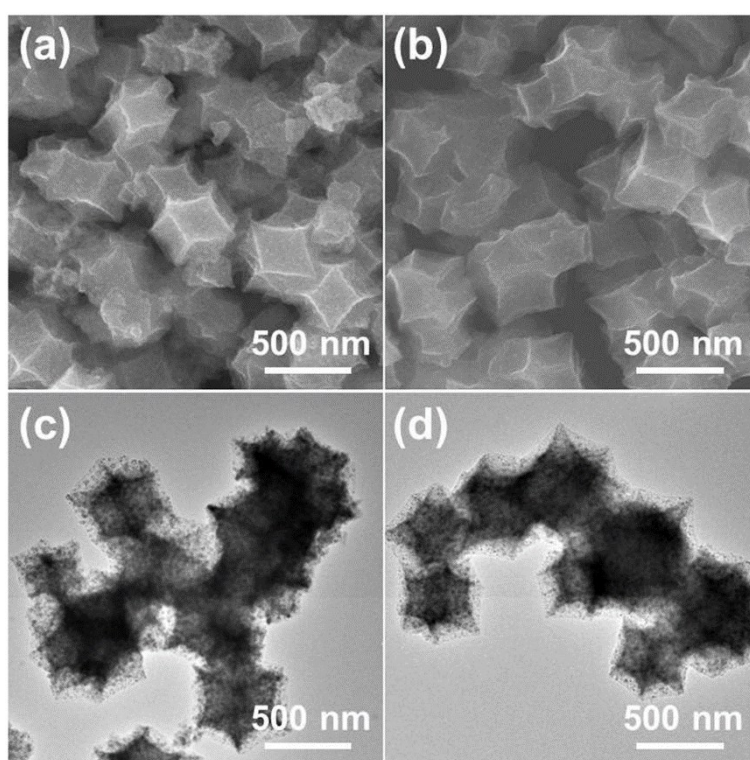

**Fig. S6** SEM and TEM images of (a, c) NiCoP/NC PH and (b, d) CoP/NC PH.

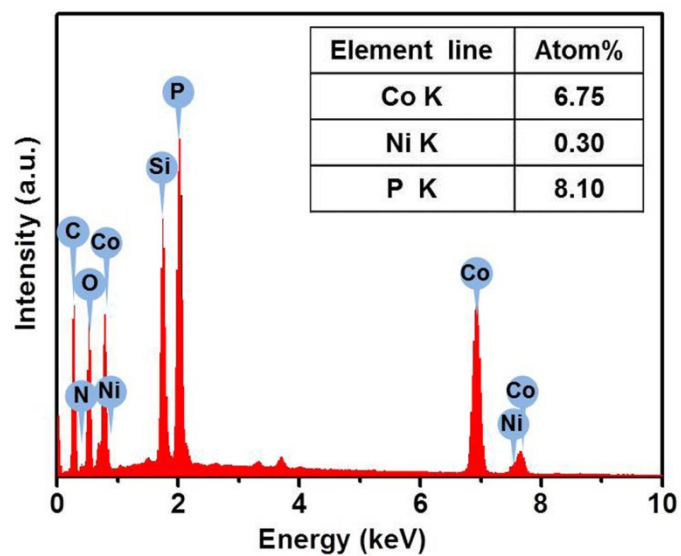

Fig. S7 EDX spectrum of NiCoP/NC PH.

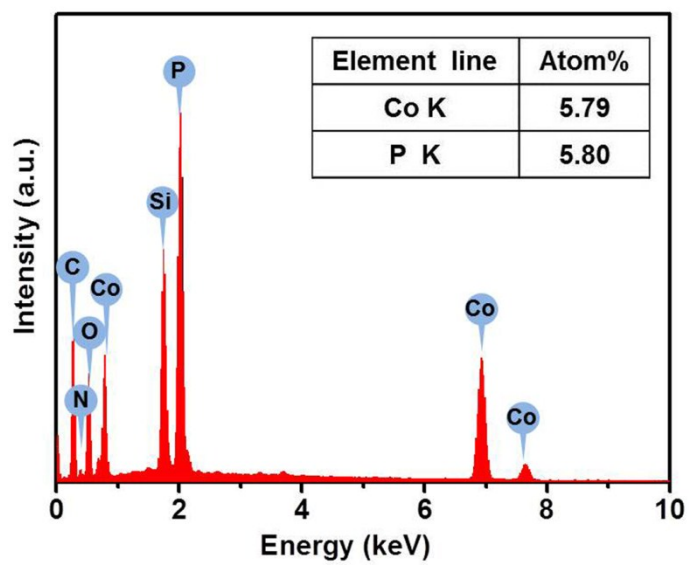

Fig. S8 EDX spectrum of CoP/NC PH.

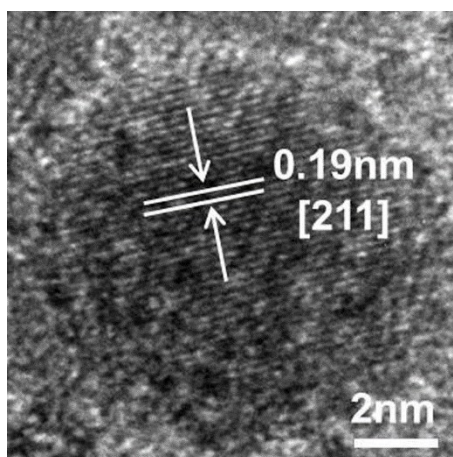

**Fig. S9** HR-TEM images of NiCoP/NC PHCs.

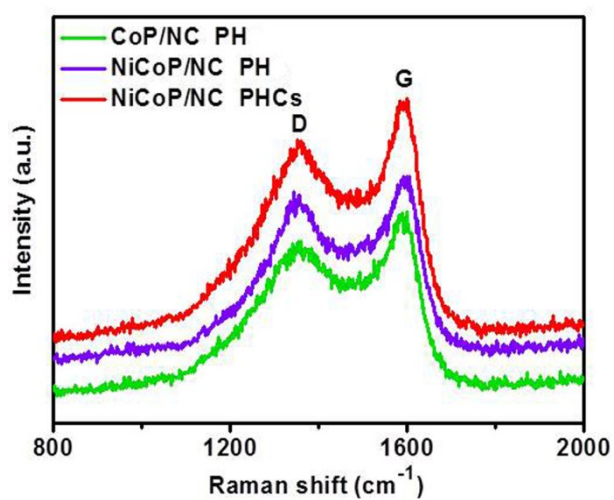

**Fig. S10** Raman spectra of NiCoP/NC PHCs, NiCoP/NC PH and CoP/NC PH.

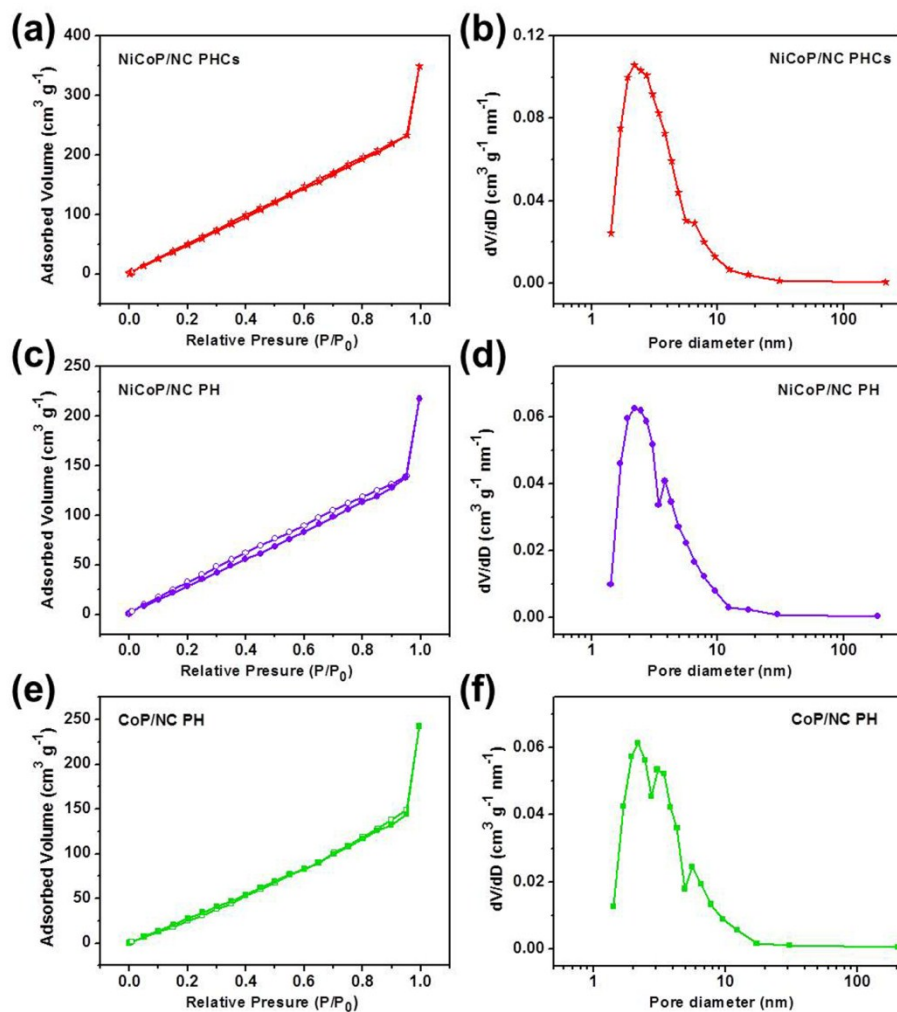

**Fig. S11** Nitrogen adsorption and desorption isotherms and BJH pore distribution of (a, b) NiCoP/NC PHCs, (c, d) NiCoP/NC PH and (e, f) CoP/NC PH.

**Table S1.** The surface area and pore volume of different samples

| Sample        | $S_{\text{BET}}$ ( $\text{m}^2 \text{g}^{-1}$ ) | $V_{\text{pore}}$ ( $\text{cm}^3 \text{g}^{-1}$ ) | $D_{\text{BJH}}$ (nm) |
|---------------|-------------------------------------------------|---------------------------------------------------|-----------------------|
| NiCoP/NC PHCs | <b>384.6</b>                                    | <b>0.662</b>                                      | <b>2.188</b>          |
| NiCoP/NC PH   | 235.0                                           | 0.406                                             | 2.191                 |
| CoP/NC PH     | 219.7                                           | 0.447                                             | 2.190                 |

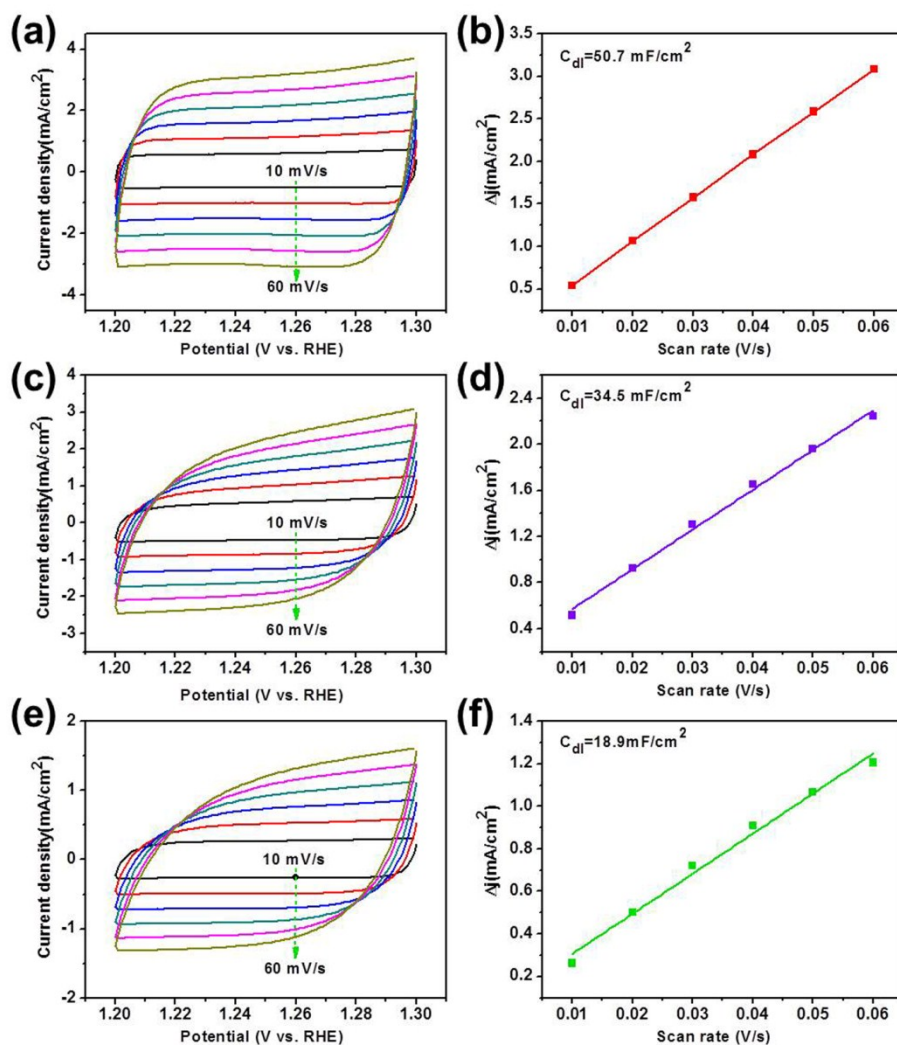

**Fig. S12** CV curves of (a) NiCoP/NC PHCs, (c) NiCoP/NC PH and (e) CoP/NC PH in the double layer region at scan rates of 10-60 mV s<sup>-1</sup> in 1.0 M KOH. (b), (d), and (f) current density as a function of scan rate derived from (a), (c) and (e), respectively.

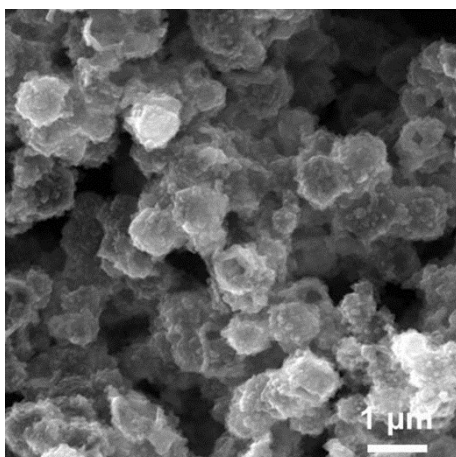

**Fig. S13** SEM image of NiCoP/NC PHCs after long-term stability test.

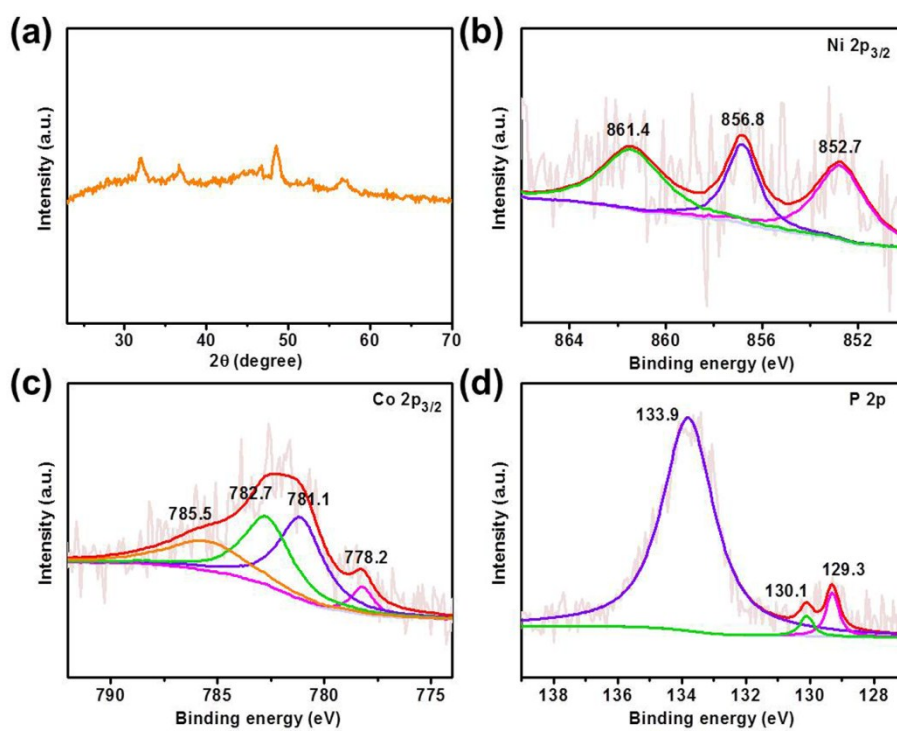

**Fig. S14** (a) XRD pattern of NiCoP/NC PHCs, and the high resolution XPS spectra of (b) Ni  $2p_{3/2}$ , (c) Co  $2p_{3/2}$ , and (d) P 2p after long-term stability test.

**Table S2.** Comparison of the OER electrocatalytic performance for different catalysts.

| Catalysts                       | Overpotential (mV)<br>at 10 mA/cm <sup>2</sup> | Reference                                                |
|---------------------------------|------------------------------------------------|----------------------------------------------------------|
| NiCoP/NC PHCs                   | 297                                            | <b>This work</b>                                         |
| NiCoP/C nanoboxes               | 330                                            | <i>Angew. Chem. Int. Ed.</i> <b>2016</b> , 55, 10381     |
| MnCoP nanoparticles             | 330                                            | <i>J. Am. Chem. Soc.</i> <b>2016</b> , 138, 4006         |
| NiCoP microspheres              | 340                                            | <i>Adv. Mater. Interfaces</i> <b>2016</b> , 3, 1500454   |
| Co-Fe-P nanoparticles           | 280                                            | <i>Angew. Chem. Int. Ed.</i> <b>2015</b> , 54, 9642      |
| CoP hollow polyhedron           | 400                                            | <i>ACS Appl. Mater. Interfaces</i> <b>2016</b> , 8, 2158 |
| Co-P/NC nanopolyhedrons         | 354                                            | <i>Chem. Mater.</i> <b>2015</b> , 27, 7636               |
| Ni <sub>2</sub> P nanoparticles | 290                                            | <i>Energy Environ. Sci.</i> <b>2015</b> , 8, 2347        |
| Co-NC@CoP-NC                    | 330                                            | <i>J. Mater. Chem. A</i> , <b>2016</b> , 4, 15836        |
| Co <sub>2</sub> P/Co-foil       | 319                                            | <i>J. Mater. Chem. A</i> , <b>2017</b> , 5, 10561        |
| Co-P-foam                       | 300                                            | <i>J. Mater. Chem. A</i> , <b>2016</b> , 4,              |

Note: All the overpotentials were measured in 1.0 M KOH.
